# Supplementary material for: Metalated carbon nitrides as base catalysts for efficient catalytic hydrolysis of carbonyl sulfide
Source: Royal Society of Chemistry journal article supplement (doi:10.1039/c9cc06246g), 2019-01-01
Supplement: c9cc06246g1.pdf [file c9cc06246g1.pdf]

## Electronic Supplementary Information

### **Metalated carbon nitrides as base catalysts for efficient catalytic hydrolysis of carbonyl sulfide**

Fangsong Guo, Shanrong Li, Yidong Hou\*, Junkang Xu, Sen Lin and Xinchen Wang\*

#### **Experimental materials**

All the reagents used are analysis grades without further purification. Melamine ( $C_3H_6N_6$ , 99%) were purchased from Sigma-Aldrich. Activated carbon, LiCl (99%), NaCl(99%), KCl(99%), RbCl(99%) and CsCl (99%) were purchased from China Sinopharm Chemical reagent Co. Ltd.. All the reagents were used without further purification.

#### **Experimental Section**

**Synthesis of PCN:** PCN was prepared by direct thermal polymerization of melamine in the air. In a typical synthesis, Melamine (10g) was thermal heated to  $600\text{ }^\circ\text{C}$  for 2 h at a rate of  $5\text{ }^\circ\text{C min}^{-1}$  in a muffle furnace. The final products were collected after the temperature cooled down to the room temperature.

**Synthesis of X-MPCN:** The metalation of PCN was achieved by a simple method of treatment of PCN materials with alkali chloride (LiCl, NaCl, KCl, RbCl and CsCl) at  $600^\circ\text{C}$  with  $N_2$  atmosphere. Typically, 2 g PCN (synthesized-above) was ground with 10 g alkali chloride (*e. g.*, KCl) in a mortar. Then, the resultant mixture was heated to  $600\text{ }^\circ\text{C}$  for 2 h at a rate of  $5\text{ }^\circ\text{C min}^{-1}$  in a tube furnace with  $N_2$  flow rate of 200 mL/min. After it was cooled to

room temperature, the product was washed with deionized water several times to remove the overmuch alkali chloride (eg, KCl). This sample is denoted as X-MPCN (eg, K<sup>+</sup>-MPCN).

**Synthesis of K<sup>+</sup>/PCN:** For comparison, the PCN material loaded with a certain amount of K<sup>+</sup> was also prepared by impregnation method. Typically, 286.5 mg KCl and 2 g PCN powders were mixed together in 10 mL of water. Then, after stirred for 10 min, the mixture was evaporated with a water vapor. The obtained solid is denoted as K<sup>+</sup>/PCN.

**Synthesis of K<sup>+</sup>/AC:** the AC material loaded with a certain amount of K<sup>+</sup> was also prepared by impregnation method. Typically, 286.5 mg KCl and 2 g AC powders were mixed together in 10 mL of water. Then, after stirred for 10 min, the mixture was evaporated with a water vapor. The obtained solids is denoted as K<sup>+</sup>/AC.

**Characterization:** Transmission electron microscopy (TEM) was obtained by Zeis 912 microscope. The CO<sub>2</sub> adsorption capacity of the samples were measured by CO<sub>2</sub> adsorption collected at 273 K using an ASAP 2020 instrument (Micromeritics, USA). The nitrogen adsorption–desorption isotherms were collected at 77 K using Micromeritics ASAP 2020 Surface Area and Porosity Analyzer. Powder X-ray diffraction (XRD) measurements were performed on Bruker D8 Advance diffractometer with Cu K $\alpha$  radiation ( $\lambda = 1.5406 \text{ \AA}$ ). Fourier transformed infrared (FTIR) spectra were recorded on BioRad FTS 6000 spectrometer. X-ray photoelectron spectroscopy (XPS) data were obtained on Thermo ESCALAB250 instrument with a monochromatized Al K $\alpha$  line source (200 W).

**Carbon dioxide temperature programmed desorption (CO<sub>2</sub>-TPD):** CO<sub>2</sub>-TPD was carried out on an AutoChem II 2920 Micromeritics Chemisorption Analyzer (USA). Before measurements, the samples were first activated at 300 °C for 1 h under a N<sub>2</sub> atmosphere.

After the temperature was reduced to 50 °C, the samples were swept by CO<sub>2</sub> for 1 h. Thereafter, N<sub>2</sub> with flow rate of 30 mLmin<sup>-1</sup> was switched again to the sample, and after reaching a stable baseline. Subsequently, the temperature was gradually increased to 350 °C with a ramping rate of 10 °C/min to obtain the CO<sub>2</sub>-TPD curves.

**Raman measurements:** The Raman measurements were performed on a Renishaw in Via Raman System 1000 with a 312 nm Nd: YAG excitation source at room temperature.

**In situ FTIR measurements :** In situ FTIR spectroscopic studies were performed on a Thermofisher Nicolet IS50 equipped with a liquid nitrogen cooled MCT-A detector. Before the measurement, the K<sup>+</sup>-MPCN sample was treated at 300 °C for 1h under N<sub>2</sub> atmosphere to remove the adsorbed contaminants. Then the FTIR spectrum of the K<sup>+</sup>-MPCN sample at 25°C was first collected as the background prior to any CO<sub>2</sub> introduction. After CO<sub>2</sub> introduction, the FTIR spectra were obtained by subtracting the background. The measurements were performed at room temperature of around 25°C.

**DFT Calculations:** DFT calculations were carried out using the Vienna ab initio simulation package (VASP5.3).<sup>1</sup> The Perdew–Burke–Ernzerhof (PBE) exchange-correlation functional was used within the spin-polarized generalized gradient approximation (GGA).<sup>2</sup> A plane-wave basis set was employed within the framework of the projector augmented-wave (PAW) method.<sup>3</sup> In order to get accurate results, the cutoff was set to 450 eV. A Gaussian smearing was used with a smearing width of 0.1 eV. Geometry relaxations were carried out until the residual forces on each ion were smaller than 0.02 eV/Å. We first relaxed a single unit cell of PCN. Then, a single Li, Na, K, Rb, or Cs atom was introduced into PCN. The van der Waals (vdW) correction was included by using the DFT-D2 approach.<sup>4</sup>

**Evaluation of catalytic activity:** The hydrolysis of COS over catalyst was performed in a fixed-bed reactor at atmospheric pressure. 0.2 g catalyst was used. At steady state, a mixture gas of N<sub>2</sub> containing COS (100 ppm) and H<sub>2</sub>O (250 ppm) was introduced into the reactor at a total flow rate of 50 mL/min. The concentration of COS in the reactor effluent was monitored on-line by a gas chromatograph (Fuli GC-9790II) equipped with a flame photometric detector. The conversion of COS was determined by analyzing the initial and the current temperature-peak areas of COS in the GC. In this study, the COS conversion was calculated as follows:

$$\text{COS conversion (\%)} = (C_0 - C_T) / C_0 \times 100$$

where C<sub>0</sub> and C<sub>T</sub> are the peak area of COS at temperatures of 20° C and 80°C, respectively.

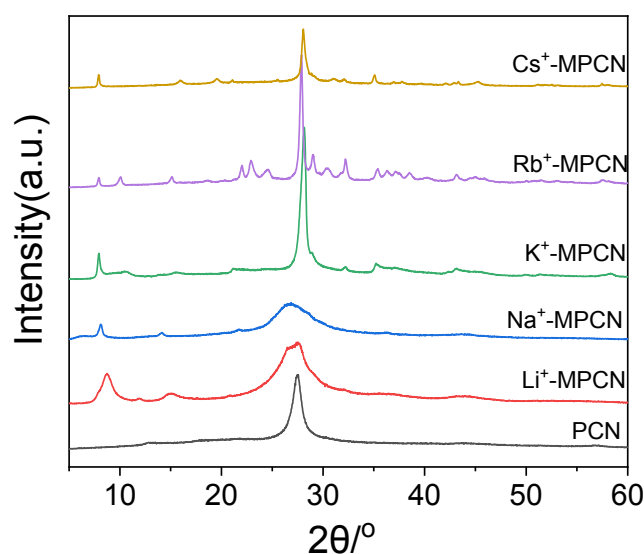

**Fig. S1** Powder XRD patterns of K<sup>+</sup>-MPCN and PCN

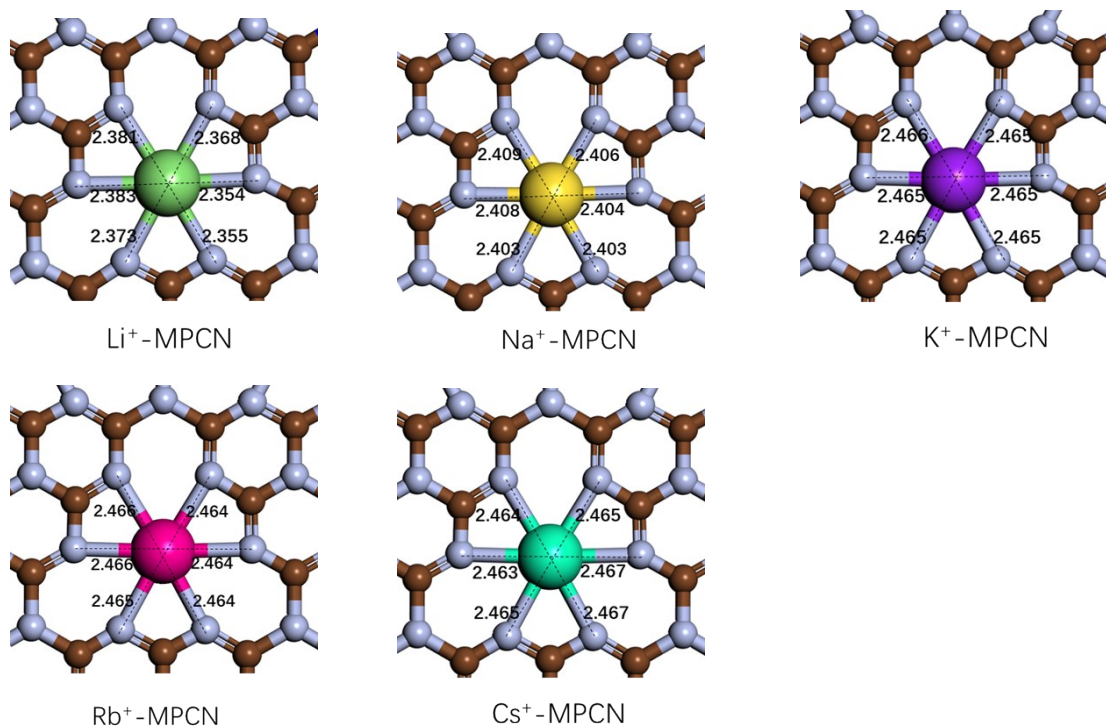

**Fig. S2** The molecular models of X-MPCN samples.

**Table S1** The adsorption energy and Bader charge of alkali metal ion in the X-MPCN structure.

|                        | Li <sup>+</sup> -MPCN | Na <sup>+</sup> -MPCN | K <sup>+</sup> -MPCN | Rb <sup>+</sup> -MPCN | Cs <sup>+</sup> -MPCN |
|------------------------|-----------------------|-----------------------|----------------------|-----------------------|-----------------------|
| Adsorption energy (eV) | -3.22                 | -3.17                 | -2.01                | -1.04                 | -5.00                 |
| Bader charge ( e )     | 0.996                 | 0.995                 | 0.754                | 0.757                 | 0.887                 |

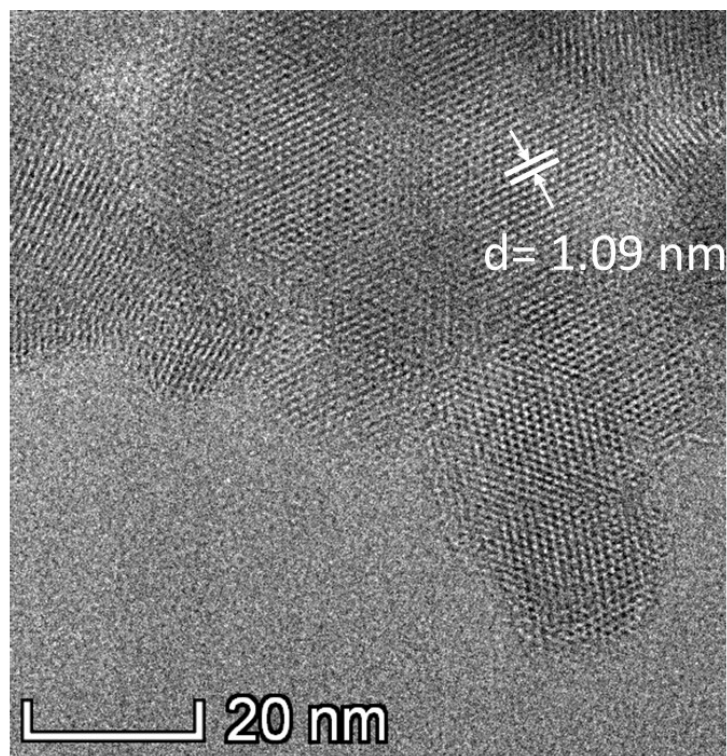

**Fig. S3** High-resolution transmission electron microscopy (HRTEM) image of K<sup>+</sup>-MPCN sample.

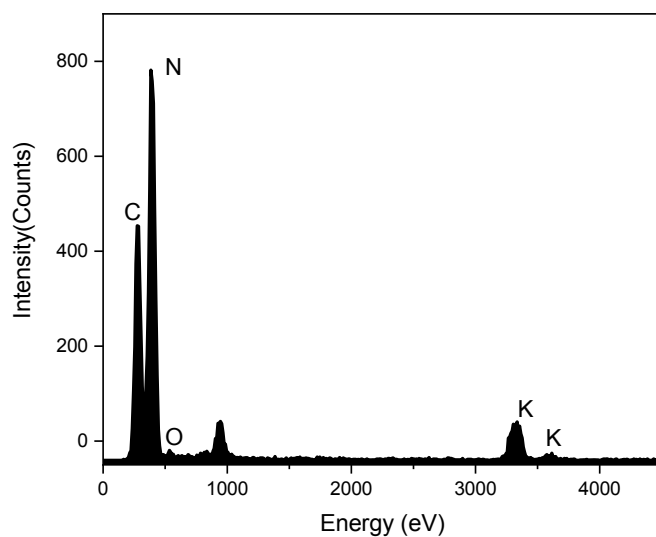

**Fig. S4** Energy dispersive X-ray (EDX) analysis of K<sup>+</sup>-MPCN sample.

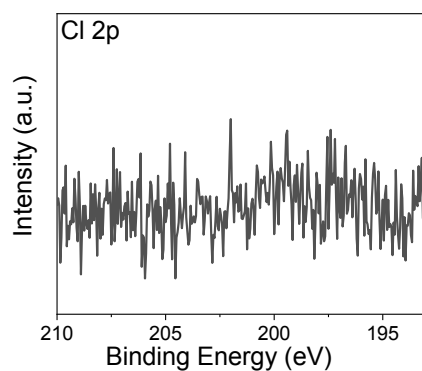

**Fig. S5** Cl 2p high-resolution XPS spectrum of K<sup>+</sup>-MPCN sample.

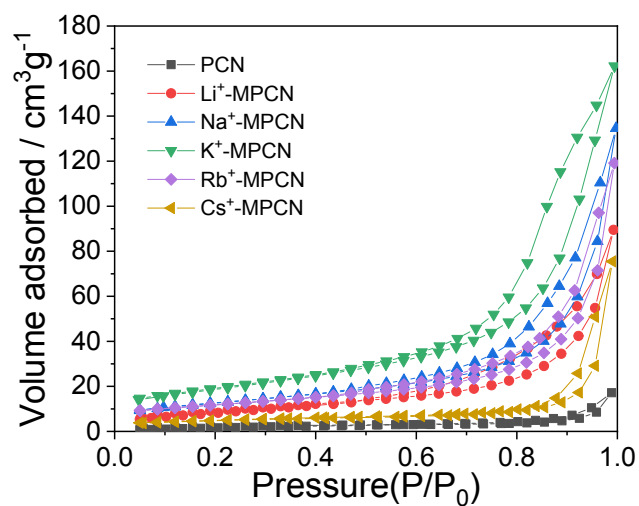

**Fig. S6** N<sub>2</sub>-sorption isotherms collected at 77 K of X-MPCN and PCN samples.

**Table S2** Physicochemical properties of X-MPCN and PCN samples from Nitrogen adsorption-desorption and CO<sub>2</sub> adsorption analysis.

| Sample                | Surface area<br>cm <sup>2</sup> g <sup>-1</sup> | Pore volume cm <sup>3</sup> g <sup>-1</sup> | CO <sub>2</sub> adsorption<br>cm <sup>3</sup> g <sup>-1</sup> |
|-----------------------|-------------------------------------------------|---------------------------------------------|---------------------------------------------------------------|
| Li <sup>+</sup> -MPCN | 26                                              | 0.12                                        | 34                                                            |
| Na <sup>+</sup> -MPCN | 31                                              | 0.14                                        | 37                                                            |
| K <sup>+</sup> -MPCN  | 38                                              | 0.16                                        | 61                                                            |
| Rb <sup>+</sup> -MPCN | 29                                              | 0.12                                        | 45                                                            |
| Cs <sup>+</sup> -MPCN | 16                                              | 0.08                                        | 42                                                            |
| PCN                   | 8                                               | 0.03                                        | 7                                                             |

**Table S3** Content of alkali metal on X-MPCN, K<sup>+</sup>/AC and K<sup>+</sup>/PCN analysis by ICP.

| Sample                                    | Li (wt.%) | Na (wt.%) | K (wt.%) | Rb (wt.%) | Cs (wt.%) |
|-------------------------------------------|-----------|-----------|----------|-----------|-----------|
| Li <sup>+</sup> -MPCN                     | 1.6       |           |          |           |           |
| Na <sup>+</sup> -MPCN                     |           | 4.9       |          |           |           |
| K <sup>+</sup> -MPCN                      |           |           | 8.0      |           |           |
| K <sup>+</sup> -MPCN <sub>recycle 1</sub> |           |           | 7.8      |           |           |
| K <sup>+</sup> -MPCN <sub>recycle 2</sub> |           |           | 7.7      |           |           |
| Rb <sup>+</sup> -MPCN                     |           |           |          | 17.3      |           |
| Cs <sup>+</sup> -MPCN                     |           |           |          |           | 25.7      |
| K <sup>+</sup> /PCN                       |           |           | 8.1      |           |           |
| K <sup>+</sup> /AC                        |           |           | 8.0      |           |           |



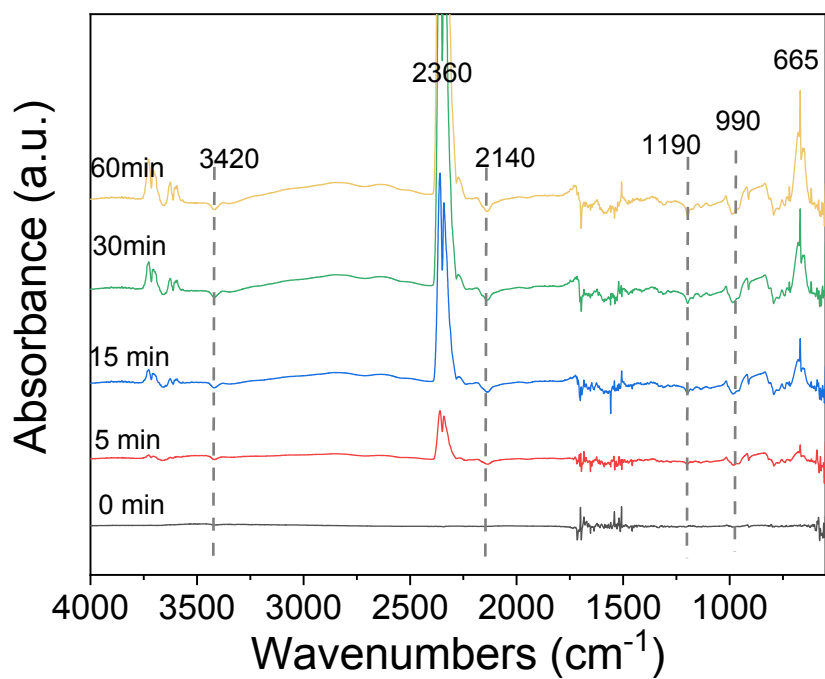

**Fig. S7** In situ FTIR spectra for the adsorption of CO<sub>2</sub> on K<sup>+</sup>-MPCN.

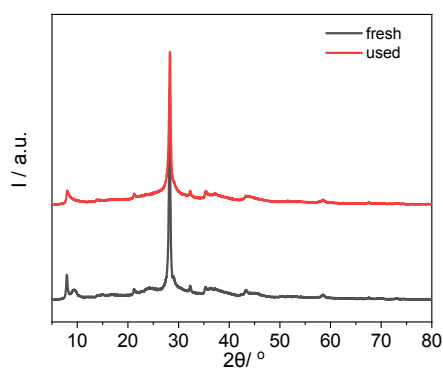

**Fig. S8** Powder XRD patterns of K<sup>+</sup>-MPCN sample before and after the COS hydrolysis reaction.

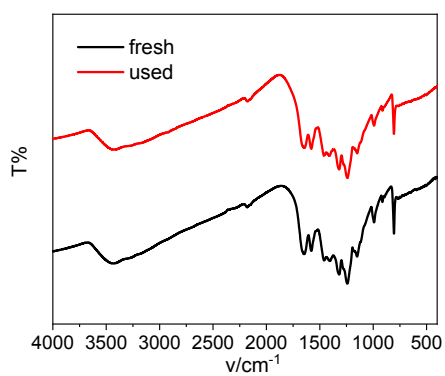

**Fig. S9** FT-IR spectra of K<sup>+</sup>-MPCN sample before and after the COS hydrolysis reaction.

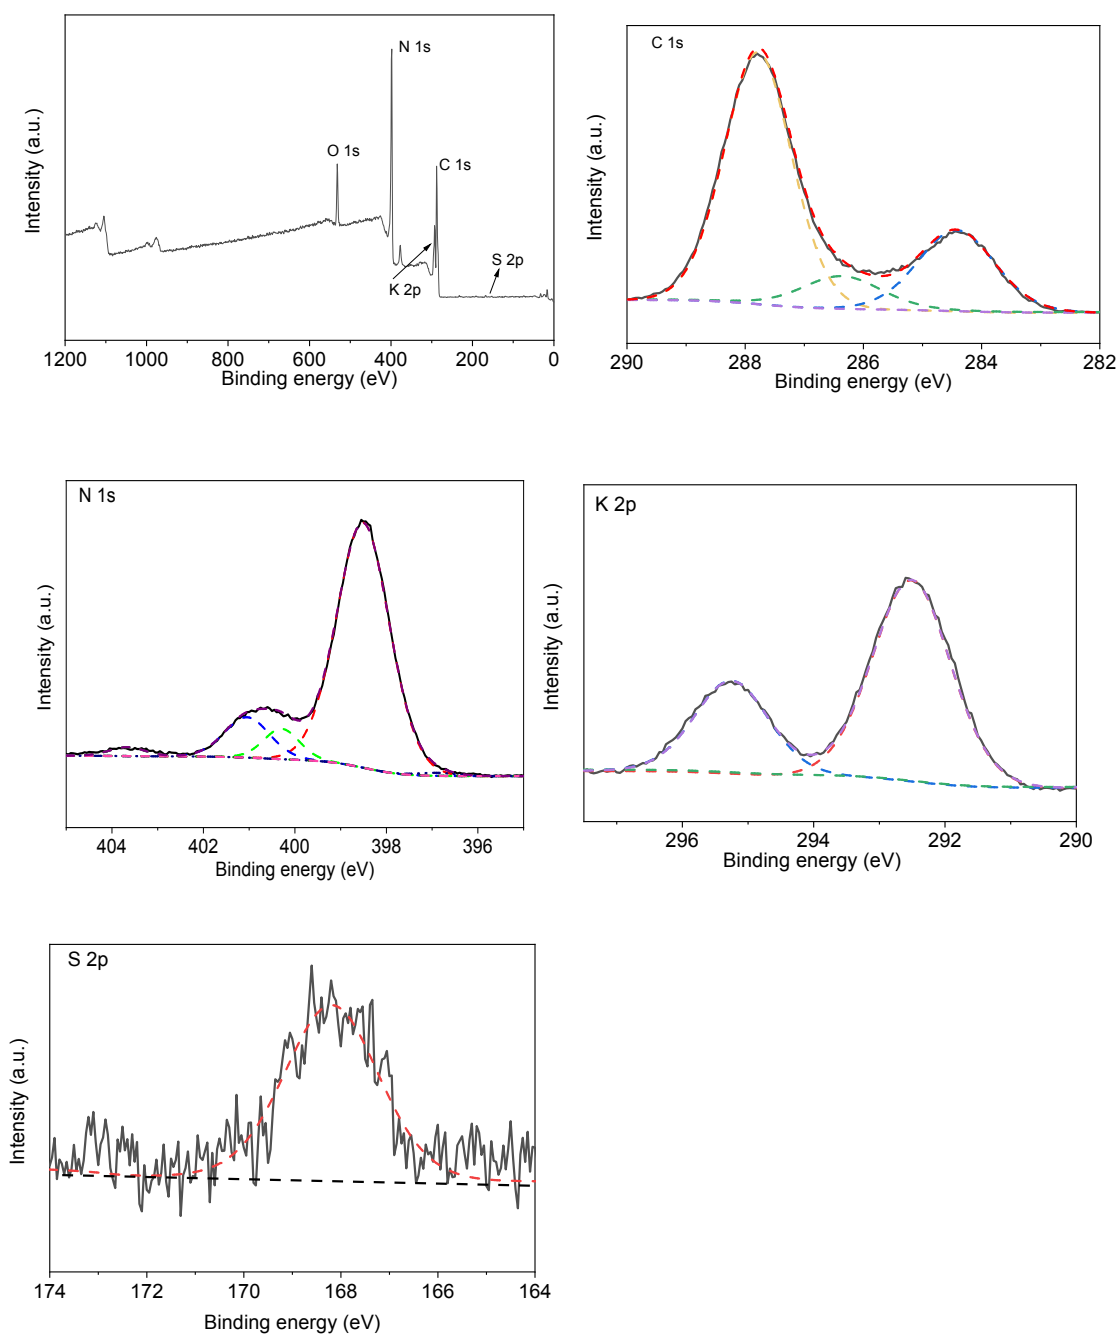

**Fig. S10** Survey and XPS analysis of  $K^+$ -MPCN sample after the COS hydrolysis reaction.

### References

1. G. Kresse and J. Furthmüller, *Phys. Rev. B*, 1996, 54, 11169-11186.
2. J. P. Perdew, K. Burke and M. Ernzerhof, *Phys. Rev. Lett.*, 1996, 77, 3865-3868.
3. G. Kresse and D. Joubert, *Phys. Rev. B*, 1999, 59, 1758-1775.
4. S. Grimme, *J. Comput. Chem.*, 2006, 27, 1787-1799.
